# Supplementary material for: Redd1 knockdown prevents doxorubicin-induced cardiac senescence
Source: publisher site journal article supplement (doi:10.18632/aging.202972), 2021-05-06
Supplement: Supplementary file [file aging-v13i10-202972-supplementary-material-SD1.pdf]

## SUPPLEMENTARY FIGURE

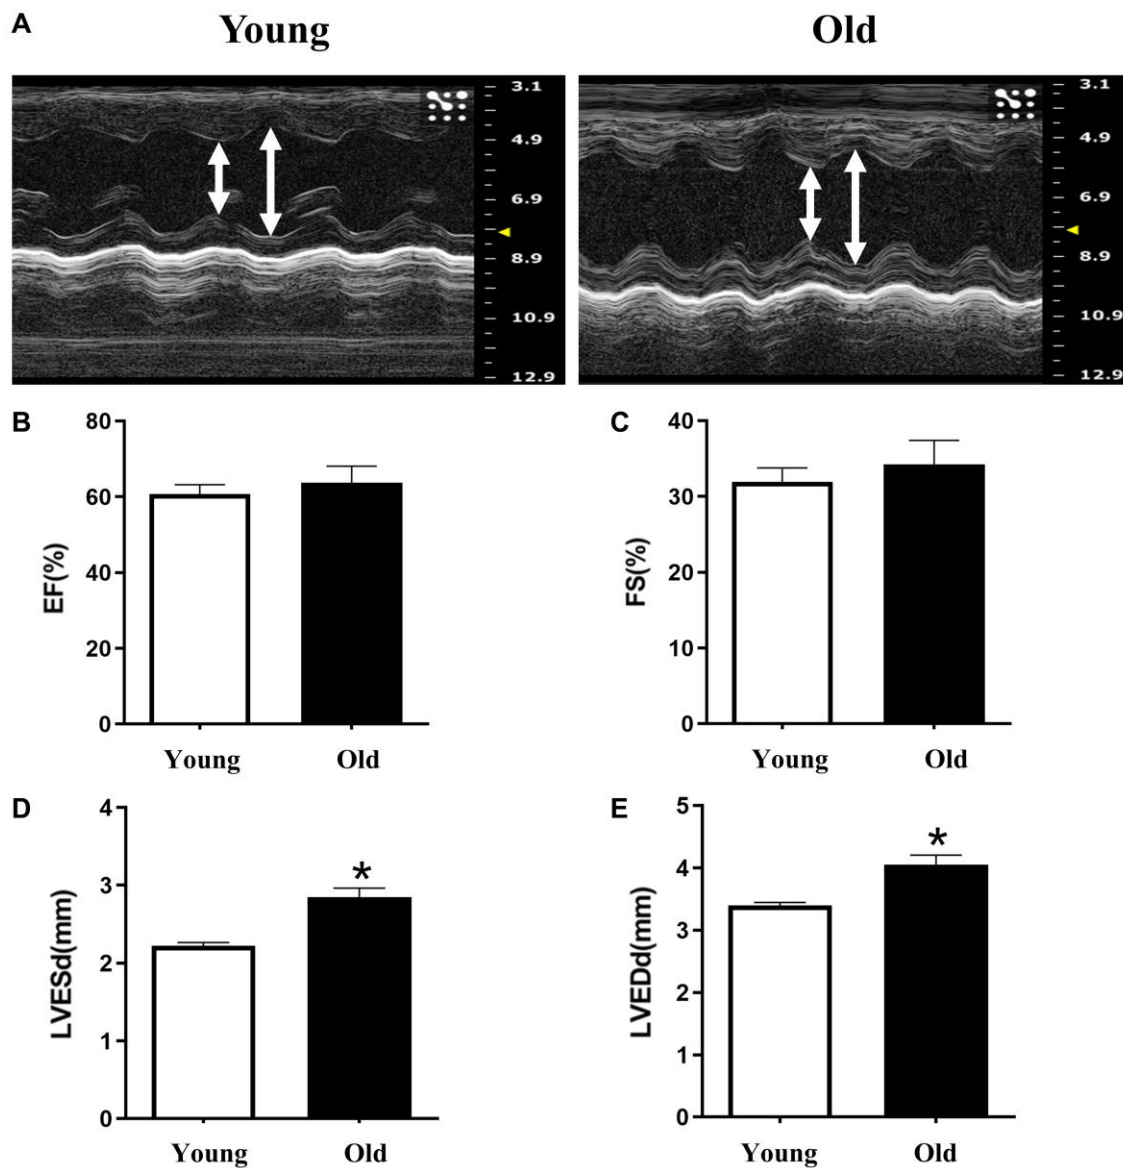

**Supplementary Figure 1. Aging induces cardiac dysfunction in mice.** (A) Representative echocardiography photographs depicting heart function in the different experimental groups. (B–E) Quantitative analysis of heart function, as determined by percent fractional shortening (FS%), ejection fraction (EF%), left ventricular (LV) end-systolic diameter (LVESd), and LV end-diastolic diameter (LVEDd) ( $n = 6$  mice per group). Data are mean  $\pm$  SEM. \* $p < 0.05$  vs. young group.
